# Supplementary material for: Study Protocol: The Impact of Growth Charts and Nutritional Supplements on Child Growth in Zambia (ZamCharts): A Cluster Randomized Controlled Trial
Source: Research Square preprint supplement (doi:10.21203/rs.3.rs-2816403/v1), 2023-04-25

# Supplemental Materials Figure SF1: Poster Design

Nutritional advice and Aspirational space

Recipes

Measurement space

Game space

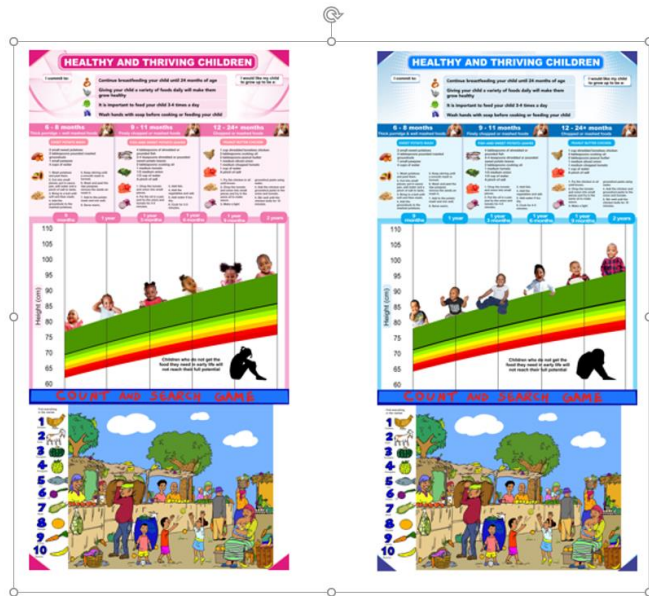

Supplement: Supplementary file 2 [file 1ecee3d19849b766b38b875c.pdf]
